# Supplementary material
Source: PubMed Central journal article supplement (PMC5357051)
Supplement: NIHMS70507-supplement-Table_S1.pdf [file NIHMS70507-supplement-Table_S1.pdf]

**Table S1.** Group-differences in [<sup>11</sup>C]carfentanil  $BP_{ND}$  and [<sup>18</sup>F]fluorodopa  $K_i$  values (ROI-analysis). All regions included in the primary ROI analysis are presented. Regions with a significance level of  $P < 0.01$  are presented in Table 3.

| Tracer                        | Region                             | HC               | PG               | BED              | F-value       | P-value       |
|-------------------------------|------------------------------------|------------------|------------------|------------------|---------------|---------------|
|                               |                                    |                  |                  |                  | One-way ANOVA | One-way ANOVA |
| [ <sup>11</sup> C]carfentanil | Fusiform gyrus                     | 0.499<br>(0.099) | 0.464<br>(0.103) | 0.361<br>(0.073) | 5.0           | 0.012         |
|                               | Caudal anterior cingulate cortex   | 1.16<br>(0.19)   | 1.08<br>(0.20)   | 0.884<br>(0.176) | 5.0           | 0.012         |
|                               | Rostral middle frontal gyrus       | 0.858<br>(0.158) | 0.874<br>(0.195) | 0.649<br>(0.145) | 4.6           | 0.017         |
|                               | Pars triangularis of VPC           | 0.783<br>(0.140) | 0.765<br>(0.199) | 0.579<br>(0.090) | 4.3           | 0.022         |
|                               | Medial temporal lobe <sup>1</sup>  | 0.490<br>(0.093) | 0.463<br>(0.109) | 0.359<br>(0.092) | 4.3           | 0.022         |
|                               | Temporal pole                      | 0.799<br>(0.140) | 0.817<br>(0.168) | 0.617<br>(0.173) | 4.2           | 0.023         |
|                               | Pars opercularis of VPC            | 0.884<br>(0.154) | 0.837<br>(0.182) | 0.685<br>(0.111) | 3.8           | 0.031         |
|                               | Inferior temporal gyrus            | 0.768<br>(0.108) | 0.737<br>(0.144) | 0.614<br>(0.123) | 3.7           | 0.035         |
|                               | Orbitofrontal cortex <sup>2</sup>  | 0.860<br>(0.142) | 0.863<br>(0.189) | 0.681<br>(0.129) | 3.6           | 0.038         |
|                               | Lateral temporal lobe <sup>3</sup> | 0.726<br>(0.095) | 0.709<br>(0.133) | 0.590<br>(0.108) | 3.6           | 0.037         |
|                               | Insula                             | 0.904<br>(0.126) | 0.850<br>(0.144) | 0.760<br>(0.097) | 3.1           | 0.060         |
|                               | Middle temporal gyrus              | 0.791<br>(0.108) | 0.774<br>(0.146) | 0.656<br>(0.129) | 2.9           | 0.070         |
|                               | Superior temporal gyrus            | 0.655<br>(0.099) | 0.654<br>(0.128) | 0.545<br>(0.109) | 2.7           | 0.084         |
|                               | Precuneus                          | 0.507<br>(0.100) | 0.490<br>(0.108) | 0.401<br>(0.103) | 2.6           | 0.085         |
|                               | Superior frontal gyrus             | 0.828<br>(0.175) | 0.836<br>(0.196) | 0.658<br>(0.162) | 2.6           | 0.087         |
|                               | Transverse temporal cortex         | 0.354<br>(0.147) | 0.327<br>(0.137) | 1.06<br>(2.24)   | 1.7           | 0.20          |
|                               | Medial orbitofrontal cortex        | 0.847<br>(0.174) | 0.880<br>(0.205) | 0.731<br>(0.148) | 1.6           | 0.22          |
|                               | Precentral gyrus                   | 0.543<br>(0.107) | 0.538<br>(0.129) | 0.452<br>(0.109) | 1.6           | 0.21          |

|                            |                                   |                      |                      |                      |       |       |
|----------------------------|-----------------------------------|----------------------|----------------------|----------------------|-------|-------|
|                            | Rostral anterior cingulate cortex | 1.05<br>(0.22)       | 1.03<br>(0.19)       | 0.887<br>(0.208)     | 1.6   | 0.21  |
|                            | Banks of superior temporal sulcus | 0.721<br>(0.0965)    | 0.714<br>(0.141)     | 0.628<br>(0.114)     | 1.6   | 0.21  |
|                            | Putamen                           | 1.19<br>(0.15)       | 1.15<br>(0.23)       | 1.05<br>(0.17)       | 1.4   | 0.25  |
|                            | Amygdala                          | 1.34<br>(0.32)       | 1.32<br>(0.29)       | 1.16<br>(0.17)       | 1.1   | 0.35  |
|                            | Nucleus caudatus                  | 1.17<br>(0.21)       | 1.05<br>(0.29)       | 1.12<br>(0.21)       | 1.0   | 0.38  |
|                            | Caudal middle frontal gyrus       | 0.733<br>(0.135)     | 0.738<br>(0.172)     | 0.657<br>(0.155)     | 0.74  | 0.48  |
|                            | Postcentral gyrus                 | 0.334<br>(0.097)     | 0.339<br>(0.109)     | 0.288<br>(0.055)     | 0.74  | 0.49  |
|                            | Globus pallidus                   | 0.517<br>(0.240)     | 0.469<br>(0.229)     | 0.588<br>(0.109)     | 0.72  | 0.49  |
|                            | Paracentral gyrus                 | 0.423<br>(0.116)     | 0.427<br>(0.115)     | 0.378<br>(0.126)     | 0.45  | 0.64  |
|                            | Supramarginal gyrus               | 0.740<br>(0.111)     | 0.747<br>(0.156)     | 0.697<br>(0.144)     | 0.35  | 0.71  |
|                            | Superior parietal cortex          | 0.288<br>(0.084)     | 0.311<br>(0.106)     | 0.291<br>(0.086)     | 0.26  | 0.77  |
|                            | Entorhinal cortex                 | 0.371<br>(0.157)     | 0.359<br>(0.185)     | 0.375<br>(0.192)     | 0.029 | 0.97  |
|                            | Inferior parietal cortex          | 0.553<br>(0.080)     | 0.561<br>(0.127)     | 0.554<br>(0.135)     | 0.021 | 0.98  |
| <sup>18</sup> F]fluorodopa | Putamen                           | 0.0133<br>(0.0015)   | 0.0137<br>(0.0019)   | 0.0113<br>(0.0032)   | 3.4   | 0.044 |
|                            | Nucleus caudatus                  | 0.0119<br>(0.0013)   | 0.0120<br>(0.0020)   | 0.0102<br>(0.0032)   | 2.0   | 0.15  |
|                            | Globus pallidus                   | 0.00601<br>(0.0013)  | 0.00630<br>(0.0015)  | 0.00537<br>(0.0011)  | 1.0   | 0.36  |
|                            | Thalamus                          | 0.00180<br>(0.00038) | 0.00162<br>(0.00041) | 0.00167<br>(0.00027) | 0.9   | 0.42  |
|                            | Hippocampus                       | 0.00264<br>(0.00081) | 0.00277<br>(0.00045) | 0.00238<br>(0.00053) | 0.79  | 0.46  |
|                            | Amygdala                          | 0.00510<br>(0.00088) | 0.00501<br>(0.00090) | 0.00486<br>(0.00134) | 0.14  | 0.87  |

<sup>1</sup>. ROI formed by fusing entorhinal cortex, fusiform gyrus, parahippocampal gyrus and temporal pole.

<sup>2</sup>. ROI formed by fusing lateral orbitofrontal cortex and medial orbitofrontal cortex.

<sup>3</sup>. ROI formed by fusing banks of superior temporal sulcus, inferior temporal gyrus, middle temporal gyrus, superior temporal gyrus and transverse temporal cortex.

VPC = ventrolateral prefrontal cortex
